# Supplementary material for: Alkalinity enhancement with sodium hydroxide in coastal ocean waters
Source: Research Square preprint supplement (doi:10.21203/rs.3.rs-7042100/v1), 2025-10-27
Supplement: Supplementary file 1 [file e12f0325f4c02f997de3e53d.pdf]

## Supplementary Information

**Table S1.** Components used in the inline (NaOH) dosing system (see Fig. S4).

| Component                   | Supplier and model               | Details                                              |
|-----------------------------|----------------------------------|------------------------------------------------------|
| Submersible pump            | Grundfos, UNILIFT AP12.50.11.1   | 220-240V, 8.5A. 2" female BSP thread                 |
| Flow meter                  | IFM, SM2604                      | Inline. 2" female NPT threads. COMS: analogue output |
| Dosing pump                 | Grundfos, SMART Digital XL – DDA | 0 – 200 L/hr dosing rate. COMS: analogue input       |
| Inline mixer                | McMaster-Carr, PN: 35385K27      | Inline. 2" male NPT threads                          |
| SeaFET                      | Satlantic                        | COMS: serial USB                                     |
| Push-To-Connect 'Y' fitting | McMaster-Carr, PN: 9087K58       | 3/8" hosing                                          |
| Push-To-Connect fittings    | McMaster-Carr, PN: 9087K11       | Male NPT thread, 1/4" hosing                         |
| Tubing (3/8" OD)            | McMaster-Carr, PN: 2129T17       | Hard, chemical resistant                             |
| Tubing (1/4" OD)            | McMaster-Carr, PN: 2129T16       | Hard, chemical resistant                             |
| ADAM-4017                   | Advantech                        | Data acquisition (flow meter)                        |
| ADAM-4021                   | Advantech                        | Data acquisition (dosing pump)                       |

**Table S2.** Background measurements during the month of observations, not including the two experimental days:  $p\text{CO}_2$  - partial pressure of  $\text{CO}_2$  in  $\mu\text{atm}$ ; pH;  $\text{TCO}_2$  - Total inorganic carbon (calculated from sensor pH and  $p\text{CO}_2$ ) in  $\mu\text{mol kg}^{-1}$ , Alk - alkalinity (calculated from sensor pH and  $p\text{CO}_2$ ) in  $\mu\text{mol kg}^{-1}$ ; SST - Sea surface temperature in  $^\circ\text{C}$ ; dissolved oxygen -  $\text{O}_2$  in  $\mu\text{mol L}^{-1}$ ;  $\text{O}_2\text{sat}$  - dissolved oxygen saturation in % and SAL - salinity. The minimum, maximum, and mean (using all observations), are given, as well as the night time (21:00 pm to 05:00 am) and day time (05:00 am to 21:00 pm) values, with associated standard deviations (stdev). Pre-trial values are shaded in grey, post-trial values are in white.

|                        | Overall        | Overall               | Night          | Night                 | Day            | Day                    | Exp hours (7am to 12pm) | Exp hours (7am to 12pm) |
|------------------------|----------------|-----------------------|----------------|-----------------------|----------------|------------------------|-------------------------|-------------------------|
|                        | Min, max       | Mean (stdev)          | Min, max       | Mean (stdev)          | Min, max       | Mean (stdev)           | Min, max                | Mean (stdev)            |
| $p\text{CO}_2$         | 352.4, 548.7   | 444.9 ( $\pm 19.6$ )  | 413.6, 536.3   | 447.1 ( $\pm 13.6$ )  | 382.8, 548.7   | 444.9 ( $\pm 21.4$ )   | 401.3, 548.7            | 455.5 ( $\pm 21.6$ )    |
| $p\text{CO}_2$         | 413.2, 542.5   | 458.4 ( $\pm 16.9$ )  | 419.5, 542.5   | 456.1 ( $\pm 10.9$ )  | 413.2, 528.2   | 462.3 ( $\pm 19.3$ )   | 442.2, 528.2            | 474.6 ( $\pm 17.1$ )    |
| pH                     | 7.89, 8.02     | 7.96 ( $\pm 0.01$ )   | 7.89, 7.99     | 7.97 ( $\pm 0.01$ )   | 7.90, 8.02     | 7.96 ( $\pm 0.02$ )    | 7.90, 7.98              | 7.95 ( $\pm 0.01$ )     |
| pH                     | 7.89, 8.03     | 7.97 ( $\pm 0.02$ )   | 7.89, 8.00     | 7.96 ( $\pm 0.01$ )   | 7.91, 8.03     | 7.96 ( $\pm 0.02$ )    | 7.91, 7.99              | 7.95 ( $\pm 0.02$ )     |
| $\text{TCO}_2$         | 1687.4, 2051.5 | 1897.8 ( $\pm 55.7$ ) | 1734.4, 2049.2 | 1923.6 ( $\pm 43.8$ ) | 1687.4, 2051.5 | 1881.0 ( $\pm 56.3$ )  | 1748.1 2051.5           | 1895.4 ( $\pm 57.4$ )   |
| $\text{TCO}_2$         | 1815.7, 2085.5 | 1931.7 ( $\pm 22.6$ ) | 1815.7, 2033.0 | 1914.2 ( $\pm 18.7$ ) | 1852.9, 2085.5 | 1931.5, ( $\pm 22.3$ ) | 1857.3 2033.4           | 1932.7 ( $\pm 22.9$ )   |
| Alk                    | 1823.5, 2223.4 | 2062.0 ( $\pm 60.6$ ) | 1873.2, 2223.4 | 2090.8 ( $\pm 46.6$ ) | 1823.5, 2217.3 | 2043.5 ( $\pm 61.4$ )  | 1886.7, 2217.3          | 2053.5 ( $\pm 62.8$ )   |
| Alk                    | 1958.1, 2299.2 | 2108.9 ( $\pm 26.1$ ) | 1958.1, 2205.0 | 2088.3 ( $\pm 21.5$ ) | 2011.2, 2299.2 | 2106.2 ( $\pm 26.3$ )  | 2011.2, 2205.1          | 2100.8 ( $\pm 26.8$ )   |
| SST                    | 13.5, 16.5     | 14.8 ( $\pm 0.6$ )    | 13.5, 16.1     | 14.7 ( $\pm 0.5$ )    | 13.5, 16.5     | 14.9 ( $\pm 0.6$ )     | 13.5, 15.7              | 14.6 ( $\pm 0.5$ )      |
| SST                    | 15.8, 18.3     | 16.5 ( $\pm 0.4$ )    | 15.8, 17.3     | 16.5 ( $\pm 0.3$ )    | 15.8, 18.3     | 16.5 ( $\pm 0.5$ )     | 15.9, 17.4              | 16.2 ( $\pm 0.2$ )      |
| $\text{O}_2$           | 213.9, 285.4   | 248.0 ( $\pm 8.3$ )   | 217.0, 266.3   | 246.0 ( $\pm 5.9$ )   | 213.9, 285.4   | 249.0 ( $\pm 9.3$ )    | 213.9, 265.0            | 242.6 ( $\pm 7.3$ )     |
| $\text{O}_2$           | 212.1, 268.4   | 244.5 ( $\pm 7.7$ )   | 217.3, 254.9   | 244.0 ( $\pm 5.4$ )   | 212.1, 268.4   | 243.1 ( $\pm 8.8$ )    | 212.1, 247.6            | 236.4, ( $\pm 6.0$ )    |
| $\text{O}_2\text{sat}$ | 84, 115        | 99 ( $\pm 4$ )        | 87, 108        | 98 ( $\pm 3$ )        | 84, 115        | 99 ( $\pm 4$ )         | 84, 106                 | 96 ( $\pm 3$ )          |
| $\text{O}_2\text{sat}$ | 87, 114        | 101 ( $\pm 4$ )       | 89, 106        | 100 ( $\pm 3$ )       | 87, 114        | 100 ( $\pm 4$ )        | 87, 102                 | 97 ( $\pm 2$ )          |
| SAL                    | 33.5, 34.1     | 33.9 ( $\pm 0.2$ )    | 33.5, 34.1     | 33.9 ( $\pm 0.2$ )    | 33.5, 34.1     | 33.9 ( $\pm 0.1$ )     | 33.5, 34.1              | 33.9 ( $\pm 0.2$ )      |
| SAL                    | 31.4, 33.9     | 33.6 ( $\pm 0.3$ )    | 32.8, 33.9     | 33.6 ( $\pm 0.2$ )    | 31.4, 33.9     | 33.6 ( $\pm 0.3$ )     | 32.5, 33.9              | 33.6 ( $\pm 0.2$ )      |

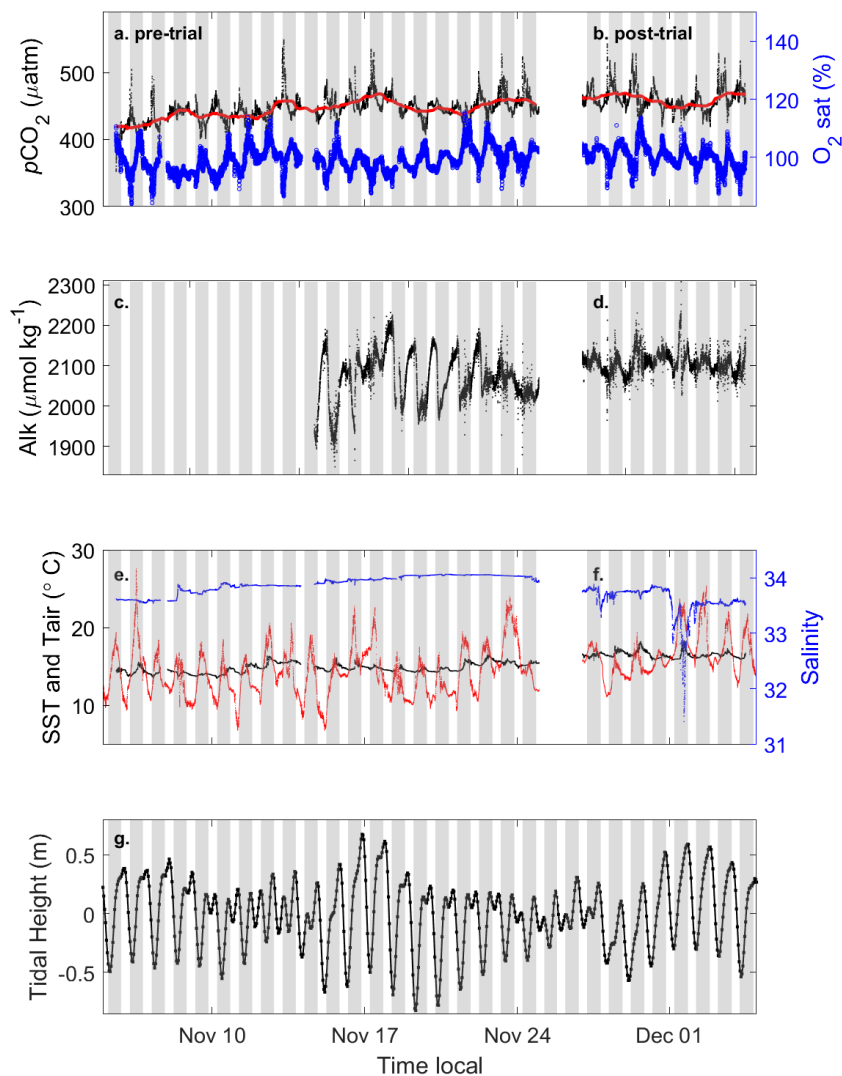

**Figure S1.** Baseline observations at the field trial site in Woodbridge, Tasmania. a., c. and e. pre-trial observations, b. d. and f. post-trial observations. a.-b.  $p\text{CO}_2$  (black) with 24h running mean (red solid line) and dissolved oxygen saturation ( $\text{O}_2\text{sat}$ , in blue); c.-d. Alkalinity (Alk) calculated from sensor  $p\text{CO}_2$  and pH. pH data was not measured prior to 14 Nov. e.-f. local sea surface temperature (black) and air temperature (red) from a nearby weather station (Dennes Point), and sea surface salinity (blue); g. tidal changes from a nearby gauge (Southport). Grey shading in all panels represents daylight hours.

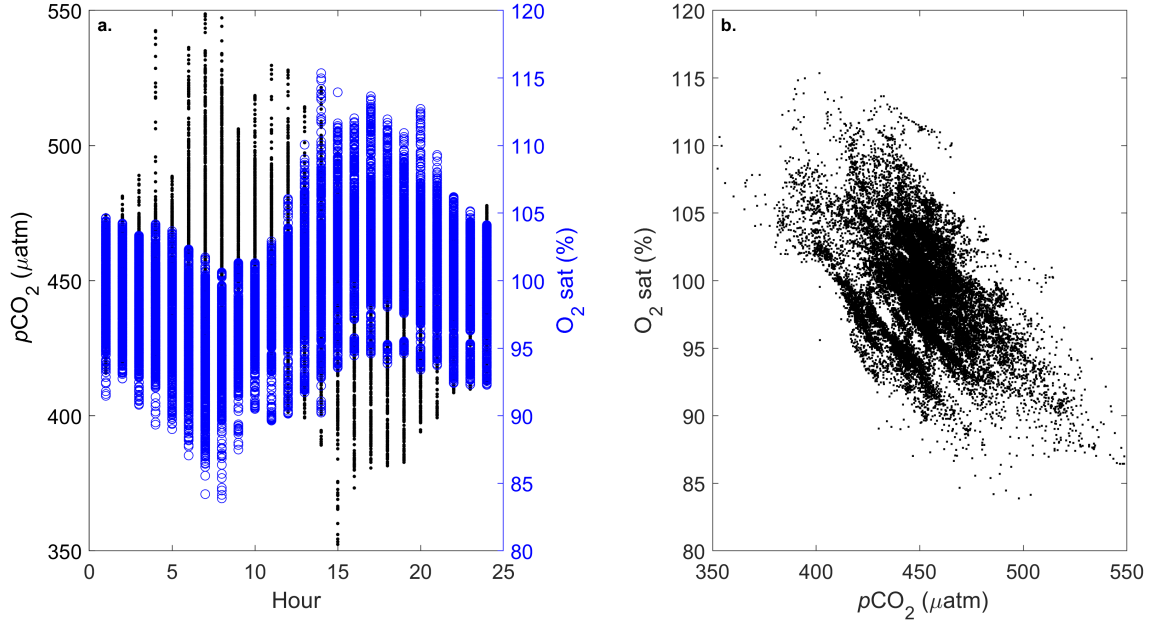

**Figure S2.** Variation in partial pressure of  $\text{CO}_2$  ( $p\text{CO}_2$ ) and dissolved oxygen saturation ( $\text{O}_2\text{sat}$ ). a. diurnal variability of  $p\text{CO}_2$  (black) and  $\text{O}_2$  (blue) based on pre-trial observations collected over three weeks. b. the relationship between  $p\text{CO}_2$  and  $\text{O}_2\text{sat}$  from observations collected as in panel a.

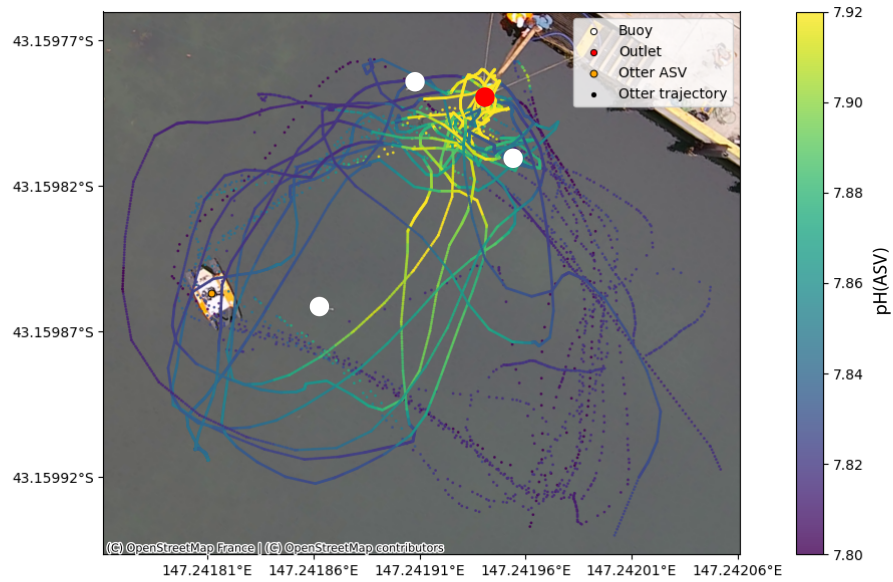

**Figure S3.** The plume of seawater modified with NaOH during Day 2 of the experiment. A piloted surface vehicle (Maritime Robotics Otter Pro) equipped with an AML Idronaut pH sensor was used to map the dispersion of the plume. The pH(ASV) observations were then interpolated to generate Figure 5c. in the main text (see Methods). The image in the background is a photograph of the field site taken with a drone; the jetty is visible in the top right corner.

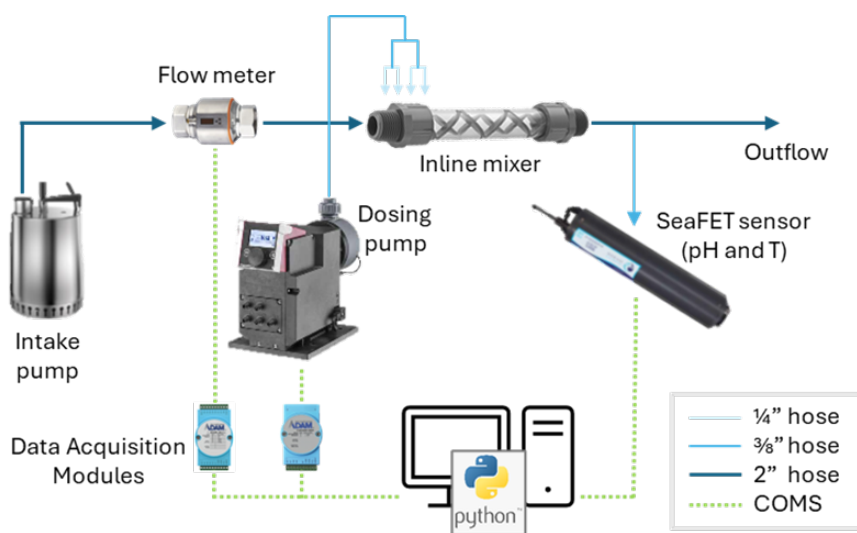

**Figure S4.** A schematic flow diagram of the inline NaOH dosing system. A list of components used to build the system is given in Table S1.
